# Supplementary material
Source: MDPI journal article supplement (https://www.mdpi.com/2311-7524/9/12/1343)
Supplement: s1 [file s1]

**The scheme of the first experiment:**

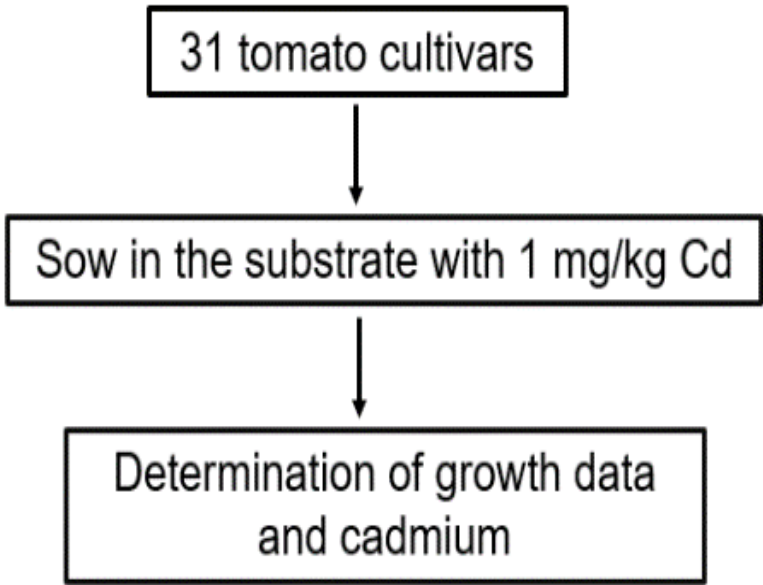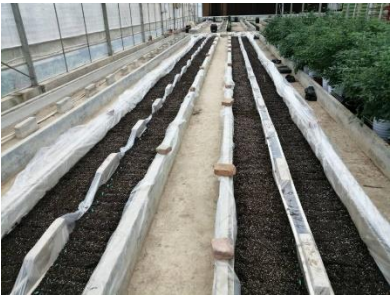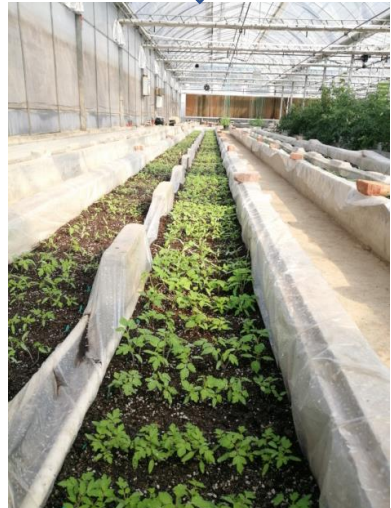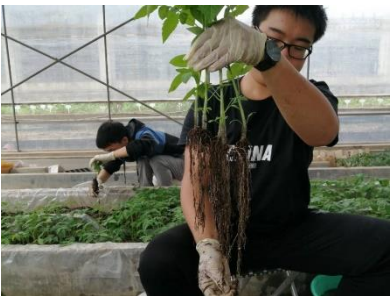

**The scheme of the second experiment:**

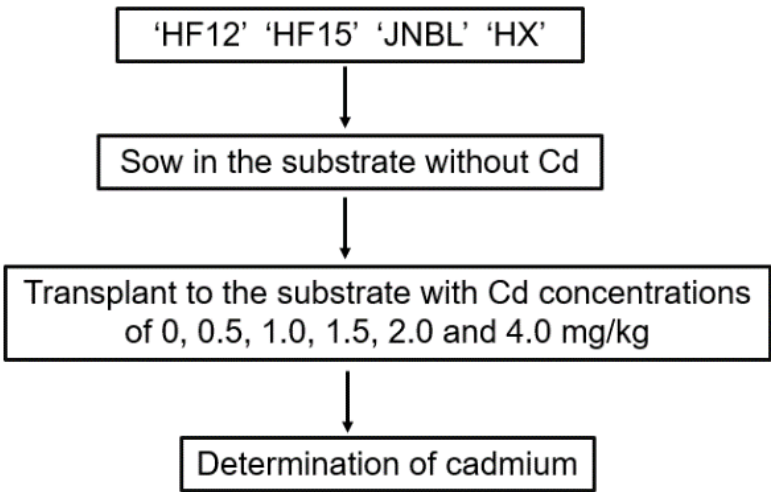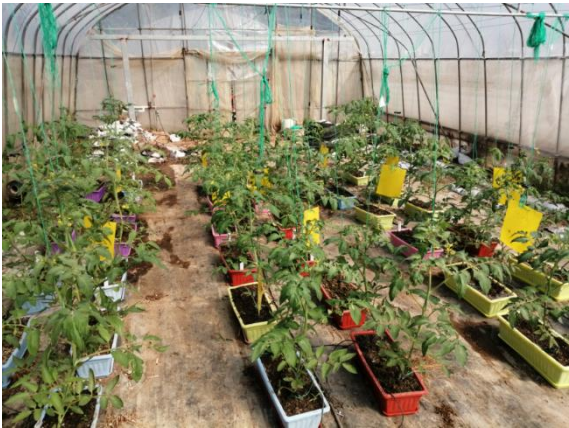

**Figure S1.** The experimental schemes and pictures
