# Supplementary material
Source: MDPI journal article supplement (https://www.mdpi.com/2311-7524/9/12/1343)
Supplement: s1 [file s1]

Archive with 3 entries (3 files):
- Supplementary Table S1.xlsx
- Supplementary Table S2.xlsx
- horticulturae-2752843-supplementary.pdf
