# Supplementary material
Source: MDPI journal article supplement (https://www.mdpi.com/2311-7524/9/12/1343)
Supplement: s1 [file s1 › Supplementary Table S1.xlsx]

## Sheet: Sheet1
Supplementary Table S1. Names and sources of 31 Tomato varieties
Cultivar no.	Chinese name	English abbreviation	Source
1	白果强丰	BGQF	Chunfeng vegetable seed Farm in Qingxian County
2	保罗塔	Paulta	Syngenta Seeds Co., Ltd.
3	东方美2号	DFM2	Syngenta Seeds Co., Ltd.
4	冬暖	DN	Syngenta Seeds Co., Ltd.
5	思贝德 colnay	Sybed	Syngenta Seeds Co., Ltd.
6	粉倍盈	FBY	Syngenta Seeds Co., Ltd.
7	改良金棚八号	GLJP8	Syngenta Seeds Co., Ltd.
8	合作906	Cooperate906	Shanghai Changzhong Tomato seed Industry Co., Ltd.
9	荷兰8号	Holland 8	Syngenta Seeds Co., Ltd.
10	鸿星	HX	Wuhan Chuwei Bio-tech Co.,Ltd
11	华番11	HF11	Huazhong Agricultural University
12	华番13	HF13	Huazhong Agricultural University
13	吉诺比利	JNBL	Wuhan Chuwei Bio-tech Co.,Ltd
14	金棚10号	JP10	Xi'an Jinpeng seedling Co., Ltd.
15	金棚M6022	JP6022	Xi'an Jinpeng seedling Co., Ltd.
16	金棚秋盛	JPQS	Xi'an Jinpeng seedling Co., Ltd.
17	拉比 Tori Star	Tori star	Syngenta Seeds Co., Ltd.
18	拉菲1906	Lafite1906	Guangzhou Asia vegetable Horticulture Seedling Co., Ltd.
19	欧贝	Oubey	Seminis Seed (Beijing) Co., Ltd.
20	欧倍	Ou Bei	Jinzhou Xinyuan Shijia Seed Industry Co., Ltd.
21	欧官	OuGuan	Seminis Seed (Beijing) Co., Ltd.
22	欧丽	Oulee	Jinzhou Xinyuan Shijia Seed Industry Co., Ltd.
23	欧盾	OuDun	Seminis Seed (Beijing) Co., Ltd.
24	普罗旺斯	Provence	Seminis Seed (Beijing) Co., Ltd.
25	齐达利	Zidali	Syngenta Seeds Co., Ltd.
26	瑞菲	Ruifei	Syngenta Seeds Co., Ltd.
27	PT5064	PT5064	Syngenta Seeds Co., Ltd.
28	SV3557TC	SV3557	Seminis Seed (Beijing) Co., Ltd.
29	SV3725TH	SV3725	Seminis Seed (Beijing) Co., Ltd.
30	SV4224TH	SV4224	Seminis Seed (Beijing) Co., Ltd.
31	KANNA218 (OUDUN)	KANNA218	Seminis Seed (Beijing) Co., Ltd.
