# Supplementary material
Source: MDPI journal article supplement (https://www.mdpi.com/2311-7524/9/12/1343)
Supplement: s1 [file s1 › Supplementary Table S2.xlsx]

## Sheet: Sheet1
Supplementary Table S2. Growth Phenotype of 31 Tomato varieties
Variations	Root fresh weight （g FW）	Root dry weight （g DW）	Root length (cm)	Shoot fresh weight (g FW)	Shoot dry weight (g DW)	Plant height (cm)
Zidali	0.69	0.084	12.3333	9.28	0.475	20.5
DN	1.52	0.166	18.4	9.14	0.82	13.7
Oulee	1.1	0.11	13	13.2	0.9	21.3333
Paulta	1.42	0.172	11.4	11.54	0.923	13.7
Holland 8	1.28	0.16	14.7333	10.34	0.93	14.9333
JP10	2.65	0.23	11.5	11.8	0.96	16.9333
OuDun	0.62	0.13	11.9667	12.31	0.989	16.1333
Provence	2.97	0.259	13.8667	12.59	1.109	14
KANNA218	1.91	0.146	12.3667	13.41	1.12	14.0667
FBY	2.45	0.3	9.4	11.52	1.12	17.2333
DFM2	2.66	0.25	14.8	15.3	1.22	15.3667
Sybed	2.53	0.3	14.3667	14.14	1.23	16.3933
Oubey	1.77	0.182	13.3333	13.69	1.249	15.0667
SV4224	2.15	0.23	18.6667	18.9	1.352	22.6667
Cooperate906	1.36	0.15	13.1667	19.38	1.409	22.6667
GLJP8	1.64	0.198	23.3333	16.99	1.492	22.8333
Ruifei	2.24	0.235	13.5333	16.87	1.501	16.7333
JP6022	1.49	0.19	16	20.61	1.57	22.6667
HF13	2.22	0.29	16.0333	18.85	1.59	21.1
SV3557	2.12	0.094	21.3333	18.74	1.614	26.8333
HF11	3.75	0.41	13.6667	19.51	1.65	16.2667
Ou Bei	2.17	0.215	16.8333	23.49	1.66	24.6667
SV3725	2.67	0.23	11.2667	18.59	1.74	18.2333
JNBL	3.82	0.41	21.2667	21.49	1.963	17.8
PT5064	2.14	0.245	18.1667	25.76	2.001	21.3333
HX	2.26	0.25	14.6667	26.36	2.01	26.5
BGQF	2.3	0.23	14.8333	27.71	2.075	26.3333
JPQS	2.79	0.311	21.3333	25.22	2.14	23.3333
Tori star	2.16	0.28	17.5	29.04	2.19	23.8333
OuGuan	2.26	0.226	17.6667	26.36	2.24	25.5
Lafite1906	2.7	0.3	20.1667	31.74	2.5	25.5
